# Supplementary material for: Body Burden of Dichlorodiphenyl Dichloroethene (DDE) and Childhood Pulmonary Function
Source: PubMed Central journal article supplement (PMC5708015; doi:10.3390/ijerph14111376), 2017-11-14
Supplement: ijerph-14-01376-s001.pdf [file ijerph-14-01376-s001.pdf]

**Table S1.** The standardized direct, indirect and total effects of DDE and covariates explaining height and weight from path analysis model at 10 years of age.

| Covariates                        |                 | Height (cm) |          |         | Weight (kg)  |
|-----------------------------------|-----------------|-------------|----------|---------|--------------|
|                                   |                 | Direct      | Indirect | Total   | Direct/Total |
| DDE at 8 years of age             | Estimate        | 1.3         | -1.59    | -0.28   | -0.24        |
|                                   | SE              | 0.35        | 0.38     | 0.05    | 0.05         |
|                                   | <i>P</i> -value | 0.0002      | <0.0001  | <0.0001 | <0.0001      |
| Age (years)                       | Estimate        | -1.14       | 1.36     | 0.2     | 0.20         |
|                                   | SE              | 0.33        | 0.36     | 0.05    | 0.05         |
|                                   | <i>P</i> -value | 0.0005      | 0.0002   | <0.0001 | <0.0001      |
| Weight at 8 years of age          | Estimate        | 6.72        |          | 6.72    |              |
|                                   | SE              | 0.23        |          | 0.23    |              |
|                                   | <i>P</i> -value | <0.0001     |          | <0.0001 |              |
| Girls vs. Boys                    | Estimate        | -0.14       |          | -0.14   |              |
|                                   | SE              | 0.04        |          | 0.04    |              |
|                                   | <i>P</i> -value | 0.0003      |          | 0.0003  |              |
| Being breastfed as child          | Estimate        | -0.60       | 0.63     | 0.03    | 0.09         |
|                                   | SE              | 0.41        | 0.45     | 0.07    | 0.07         |
|                                   | <i>P</i> -value | 0.1474      | 0.1650   | 0.6573  | 0.1613       |
| Maternal smoking during pregnancy | Estimate        | 0.05        | -0.09    | -0.04   | -0.01        |
|                                   | SE              | 0.33        | 0.36     | 0.05    | 0.05         |
|                                   | <i>P</i> -value | 0.8684      | 0.7963   | 0.4586  | 0.7963       |

Goodness of Fit Criteria: Chi-squared test statistic = 5.7, *p*-value < 0.05; AGFI = 0.9991; CFI=0.9936; RMSEA=0.0749. Estimates represent path coefficients with relative importance between -1 and +1. Weight is the first endogenous variable determined by exogenous variables- DDE, age, breastfeeding, and maternal smoking during pregnancy and hence only has direct effects and no indirect effects.

**Table S2.** The standardized direct, indirect and total effects of DDE and covariates explaining height and weight based on structural equation models. Goodness of Fit Criteria: Chi-squared test statistic = 33.1,  $p$ -value < 0.05; AGFI = 0.898; CFI = 0.994; RMSEA = 0.048. Estimates represent path coefficients with relative importance between -1 and +1.

| <b>Height at 10 years of age (cm)</b> |              |      |            |               |      |            |                 |      |            |
|---------------------------------------|--------------|------|------------|---------------|------|------------|-----------------|------|------------|
|                                       | <b>Total</b> |      |            | <b>Direct</b> |      |            | <b>Indirect</b> |      |            |
| Covariates                            | Estimate     | SE   | $p$ -value | Estimate      | SE   | $p$ -value | Estimate        | SE   | $p$ -value |
| DDE at 8 years of age                 | -0.241       | 0.05 | <0.0001    |               |      |            | -0.241          | 0.05 | <0.0001    |
| DDE at 10 years of age                | 0.018        | 0.02 | 0.4313     | 0.020         | 0.02 | 0.3948     | -0.001          | 0.00 | 0.365      |
| Height at 8 years of age              | 0.922        | 0.02 | <0.0001    | 0.922         | 0.02 | <0.0001    |                 |      |            |
| Weight at 8 years of age              | 1.436        | 0.54 | 0.008      |               |      |            | 1.436           | 0.54 | 0.008      |
| Weight at 10 years of age             | 0.043        | 0.03 | 0.1594     | 0.043         | 0.03 | 0.1594     |                 |      |            |
| Age (in years)                        | 0.024        | 0.02 | 0.2757     | 0.023         | 0.02 | 0.2961     | 0.001           | 0.00 | 0.3043     |
| Girls vs. Boys                        | -0.033       | 0.04 | 0.3937     | 0.107         | 0.02 | <0.0001    | -0.141          | 0.04 | 0.0001     |
| Being breastfed as child              | 0.043        | 0.07 | 0.5174     | 0.040         | 0.03 | 0.1324     | 0.003           | 0.06 | 0.9628     |
| Maternal smoking during pregnancy     | 0.012        | 0.05 | 0.8168     | 0.026         | 0.02 | 0.2229     | -0.014          | 0.05 | 0.7756     |
| <b>Weight at 10 years of age (kg)</b> |              |      |            |               |      |            |                 |      |            |
|                                       | <b>Total</b> |      |            | <b>Direct</b> |      |            | <b>Indirect</b> |      |            |
| Covariates                            | Estimate     | SE   | $p$ -value | Estimate      | SE   | $p$ -value | Estimate        | SE   | $p$ -value |
| DDE in year 1995                      | -0.19        | 0.05 | <0.0001    |               |      |            | -0.19           | 0.05 | <0.0001    |
| DDE in year 1997                      | -0.03        | 0.02 | 0.265      | -0.03         | 0.02 | 0.265      |                 |      |            |
| Weight in year 1995                   | 0.92         | 0.01 | <0.0001    | 0.92          | 0.01 | <0.0001    |                 |      |            |
| Age (in years)                        | 0.03         | 0.02 | 0.16       | 0.03          | 0.02 | 0.16       |                 |      |            |
| Being breastfed as child              | 0.08         | 0.07 | 0.2039     | 0.03          | 0.03 | 0.246      | 0.05            | 0.06 | 0.4054     |
| Maternal smoking during pregnancy     | 0.01         | 0.05 | 0.7914     | 0.01          | 0.02 | 0.6888     | 0.01            | 0.05 | 0.9225     |

**Table S3.** The standardized direct, indirect and total effects of DDE and covariates explaining FVC (L) at age 10 years using a structural equation model.

| Covariates                        | Total    |      |                 | Direct   |      |                 | Indirect |      |                 |
|-----------------------------------|----------|------|-----------------|----------|------|-----------------|----------|------|-----------------|
|                                   | Estimate | SE   | <i>p</i> -value | Estimate | SE   | <i>p</i> -value | Estimate | SE   | <i>p</i> -value |
| DDE at 8 years of age             | -0.18    | 0.04 | <0.0001         |          |      |                 | -0.18    | 0.04 | <0.0001         |
| DDE at 10 years of age            | 0.01     | 0.04 | 0.836           | 0.01     | 0.03 | 0.8675          | 0.002    | 0.02 | 0.8945          |
| Age                               | 0.05     | 0.04 | 0.1421          | 0.03     | 0.03 | 0.3179          | 0.02     | 0.01 | 0.1759          |
| Height at 8 years of age          | 0.52     | 0.04 | <0.0001         | 0.08     | 0.11 | 0.4726          | 0.44     | 0.10 | <0.0001         |
| Weight at 8 years of age          | 1.04     | 0.31 | 0.0007          |          |      |                 | 1.04     | 0.31 | 0.0007          |
| Height at 10 years of age         | 0.48     | 0.10 | <0.0001         | 0.48     | 0.10 | <0.0001         |          |      |                 |
| Weight at 10 years of age         | 0.278    | 0.05 | <0.0001         | 0.26     | 0.04 | <0.0001         | 0.02     | 0.02 | 0.1771          |
| Girls vs. Boys                    | -0.25    | 0.04 | <0.0001         | -0.23    | 0.04 | <0.0001         | -0.03    | 0.02 | 0.2686          |
| Being breastfed as child          | 0.0004   | 0.06 | 0.9956          | -0.04    | 0.04 | 0.3166          | 0.04     | 0.05 | 0.397           |
| Maternal smoking during pregnancy | -0.06    | 0.05 | 0.252           | -0.07    | 0.04 | 0.0612          | 0.01     | 0.04 | 0.8344          |
| Environmental tobacco smoke       | 0.08     | 0.04 | 0.0407          | 0.08     | 0.04 | 0.0407          |          |      |                 |

Goodness of Fit Criteria: Chi-squared test statistic = 33.1, *p*-value < 0.05; AGFI = 0.898; CFI = 0.994; RMSEA = 0.048. Estimates represent path coefficients with relative importance between -1 and +1.

**Table S4.** The standardized direct, indirect and total effects of DDE and covariates explaining FEV<sub>1</sub> (L) at age 10 years using a structural equation model.

| Covariates                        | Total    |      |                 | Direct   |      |                 | Indirect |      |                 |
|-----------------------------------|----------|------|-----------------|----------|------|-----------------|----------|------|-----------------|
|                                   | Estimate | SE   | <i>p</i> -value | Estimate | SE   | <i>p</i> -value | Estimate | SE   | <i>p</i> -value |
| DDE at 8 years of age             | -0.17    | 0.04 | <0.0001         |          |      |                 | -0.17    | 0.04 | <0.0001         |
| DDE at 10 years of age            | 0.02     | 0.04 | 0.6785          | 0.02     | 0.04 | 0.6909          | 0.002    | 0.02 | 0.9072          |
| Age                               | 0.08     | 0.04 | 0.0536          | 0.06     | 0.04 | 0.1345          | 0.02     | 0.02 | 0.1596          |
| Height at 8 years of age          | 0.51     | 0.05 | <0.0001         | 0.01     | 0.12 | 0.9419          | 0.51     | 0.11 | <0.0001         |
| Weight at 8 years of age          | 0.21     | 0.05 | <0.0001         |          |      |                 | 0.21     | 0.05 | <0.0001         |
| Height at 10 years of age         | 0.53     | 0.12 | <0.0001         | 0.53     | 0.12 | <0.0001         |          |      |                 |
| Weight at 10 years of age         | 0.23     | 0.05 | <0.0001         | 0.23     | 0.05 | <0.0001         |          |      |                 |
| Girls vs. Boys                    | -0.13    | 0.04 | 0.0021          | -0.11    | 0.04 | 0.0055          | -0.02    | 0.03 | 0.467           |
| Being breastfed as child          | 0.04     | 0.07 | 0.5065          | 0.001    | 0.05 | 0.9879          | 0.04     | 0.05 | 0.3583          |
| Maternal smoking during pregnancy | -0.09    | 0.06 | 0.1203          | -0.1     | 0.04 | 0.0213          | 0.01     | 0.04 | 0.7723          |
| Environmental tobacco smoke       | 0.07     | 0.04 | 0.1091          | 0.07     | 0.04 | 0.1091          |          |      |                 |

Goodness of Fit Criteria: Chi-squared test statistic = 33.7, *p*-value < 0.05; AGFI = 0.909; CFI = 0.994; RMSEA = 0.043. Estimates represent path coefficients with relative importance between -1 and +1.

**Table S5.** The standardized direct, indirect and total effects of DDE and covariates explaining the ratio FEV<sub>1</sub>/FVC at age 10 years using a structural equation model.

| Covariates                        | Total    |      |                 | Direct   |      |                 | Indirect |      |                 |
|-----------------------------------|----------|------|-----------------|----------|------|-----------------|----------|------|-----------------|
|                                   | Estimate | SE   | <i>p</i> -value | Estimate | SE   | <i>p</i> -value | Estimate | SE   | <i>p</i> -value |
| DDE at 8 years of age             | 0.02     | 0.19 | 0.9107          | -0.01    | 0.19 | 0.9574          | 0.03     | 0.02 | 0.0441          |
| DDE at 10 years of age            | 0.06     | 0.18 | 0.7405          | 0.06     | 0.18 | 0.7558          | 0.004    | 0.00 | 0.4165          |
| Age                               | 0.03     | 0.05 | 0.6091          |          |      |                 | -0.001   | 0.00 | 0.8015          |
| Height at 8 years of age          | -0.06    | 0.07 | 0.3977          | -0.13    | 0.17 | 0.4582          | 0.07     | 0.15 | 0.6749          |
| Weight at 8 years of age          | -0.17    | 0.09 | 0.0607          |          |      |                 | -0.17    | 0.09 | 0.0607          |
| Height at 10 years of age         | 0.07     | 0.17 | 0.6749          | 0.07     | 0.17 | 0.6749          |          |      |                 |
| Weight at 10 years of age         | -0.09    | 0.07 | 0.209           | -0.09    | 0.07 | 0.2035          | 0.003    | 0.01 | 0.6893          |
| Girls vs. Boys                    | 0.3      | 0.05 | <0.0001         | 0.28     | 0.05 | <0.0001         | 0.02     | 0.02 | 0.4248          |
| Being breastfed as child          | 0.09     | 0.07 | 0.1836          | 0.09     | 0.07 | 0.1684          | -0.004   | 0.01 | 0.7591          |
| Maternal smoking during pregnancy | -0.06    | 0.06 | 0.3292          | -0.06    | 0.06 | 0.316           | 0.001    | 0.01 | 0.8656          |
| Environmental tobacco smoke       | -0.02    | 0.06 | 0.765           | -0.02    | 0.06 | 0.765           |          |      |                 |

Goodness of Fit Criteria: Chi-squared test statistic = 28.6, *p*-value < 0.05; AGFI = 0.906; CFI = 0.995; RMSEA = 0.044. Estimates represent path coefficients with relative importance between -1 and +1.

**Figure S1.** Analytical path model showing statistically significant standardized direct and indirect effects of DDE exposure at eight years, height and weight at eight and ten years, and FVC at age 10 years in boys.

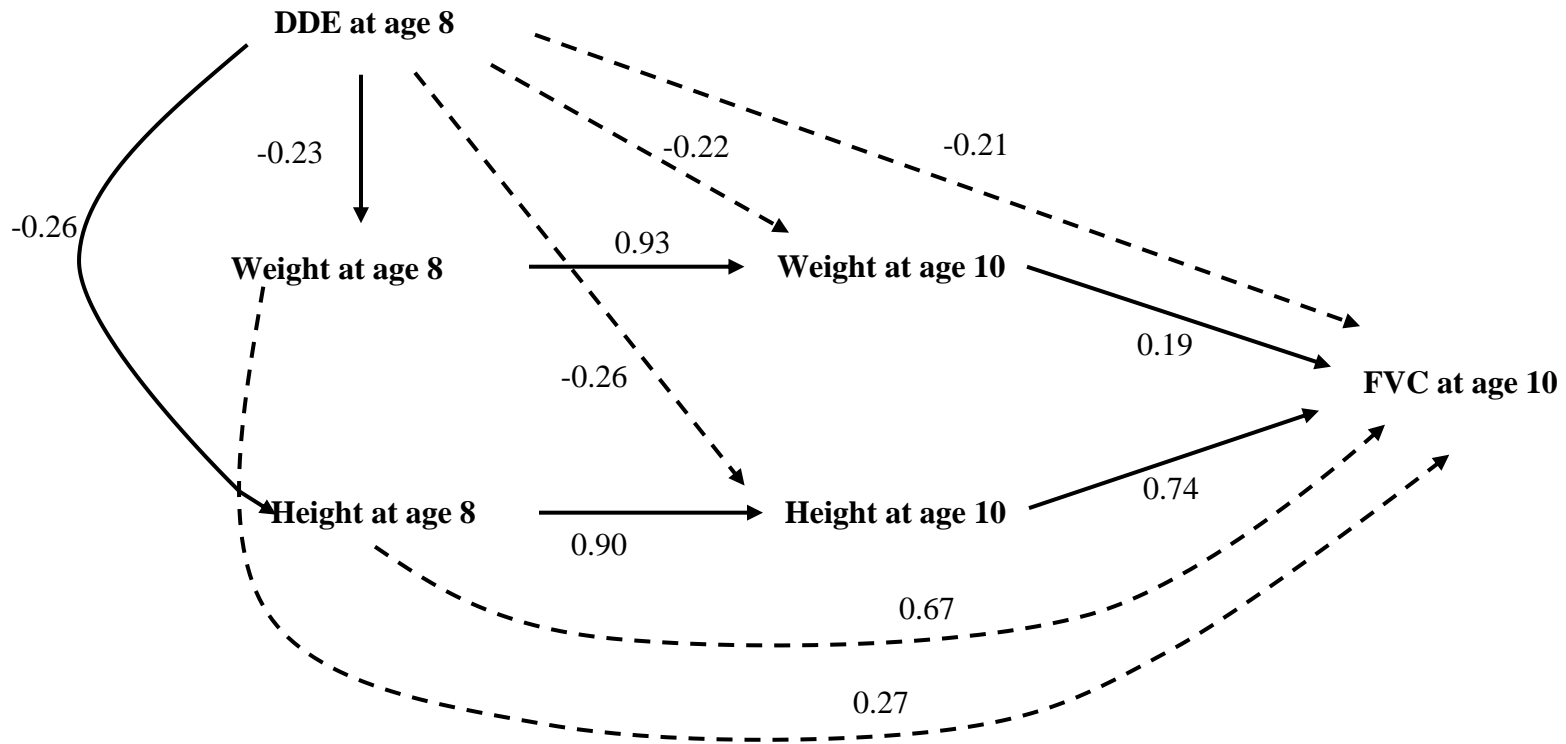

The path coefficients represented by solid arrows are direct effects while those represented by dashed arrows are indirect effects. Associations with non-significant total effects are not shown in this diagram. Goodness of Fit Criteria: Chi-squared test statistic = 31.0,  $p$ -value < 0.05; AGFI = 0.899; CFI = 0.985; RMSEA = 0.075.

**Figure S2.** Analytical path model showing statistically significant standardized direct and indirect effects of DDE exposure at eight years, height and weight at eight and ten years, and FVC at age 10 years in girls.

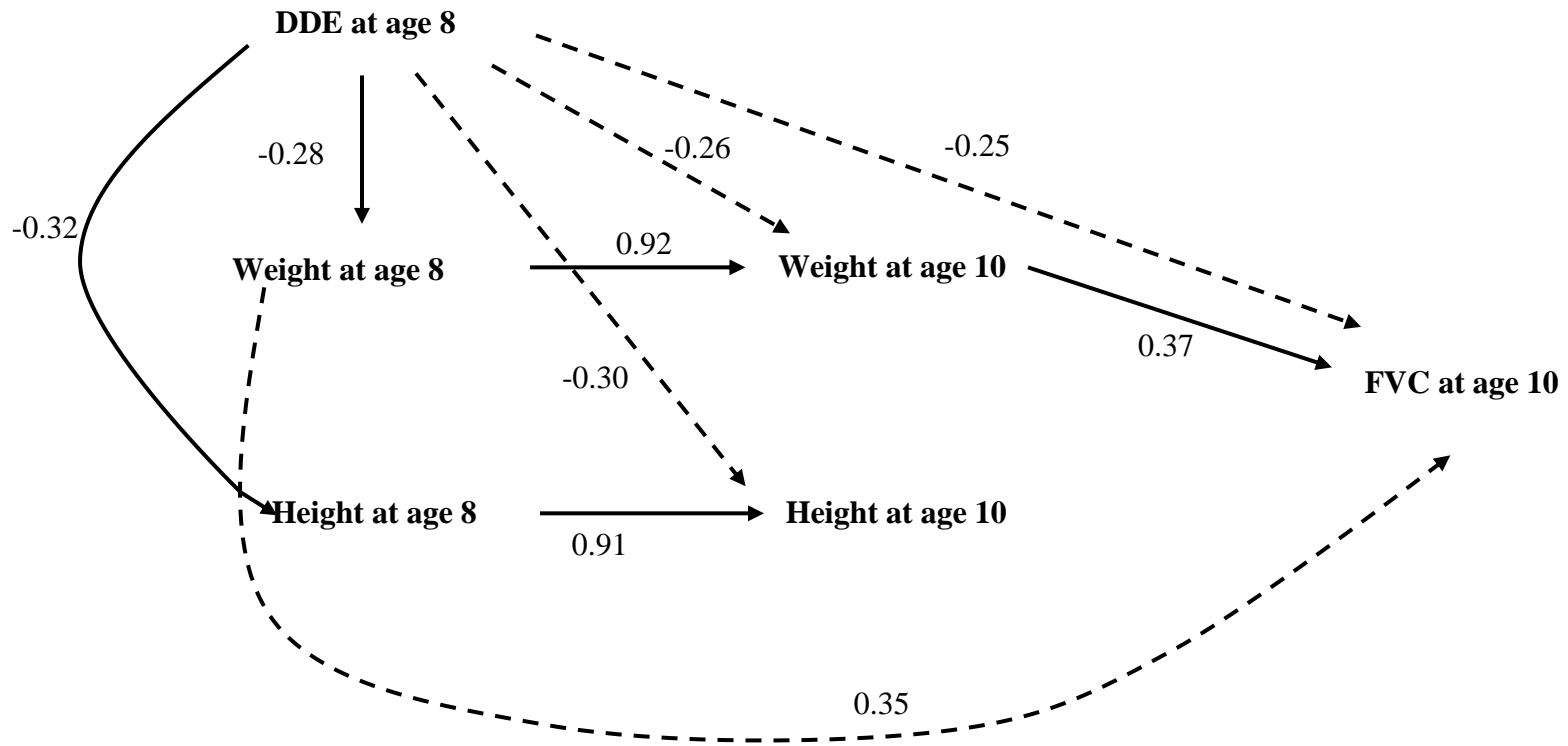

The path coefficients represented by solid arrows are direct effects while those represented by dashed arrows are indirect effects. Associations with non-significant total effects are not shown in this diagram. Goodness of Fit Criteria: Chi-squared test statistic = 18.2,  $p$ -value = 0.25; AGFI = 0.89; CFI = 0.996; RMSEA = 0.038.

**Figure S3.** Analytical path model showing statistically significant standardized direct and indirect effects of DDE exposure at eight years, height and weight at eight and ten years, and FEV<sub>1</sub> at age 10 years in boys.

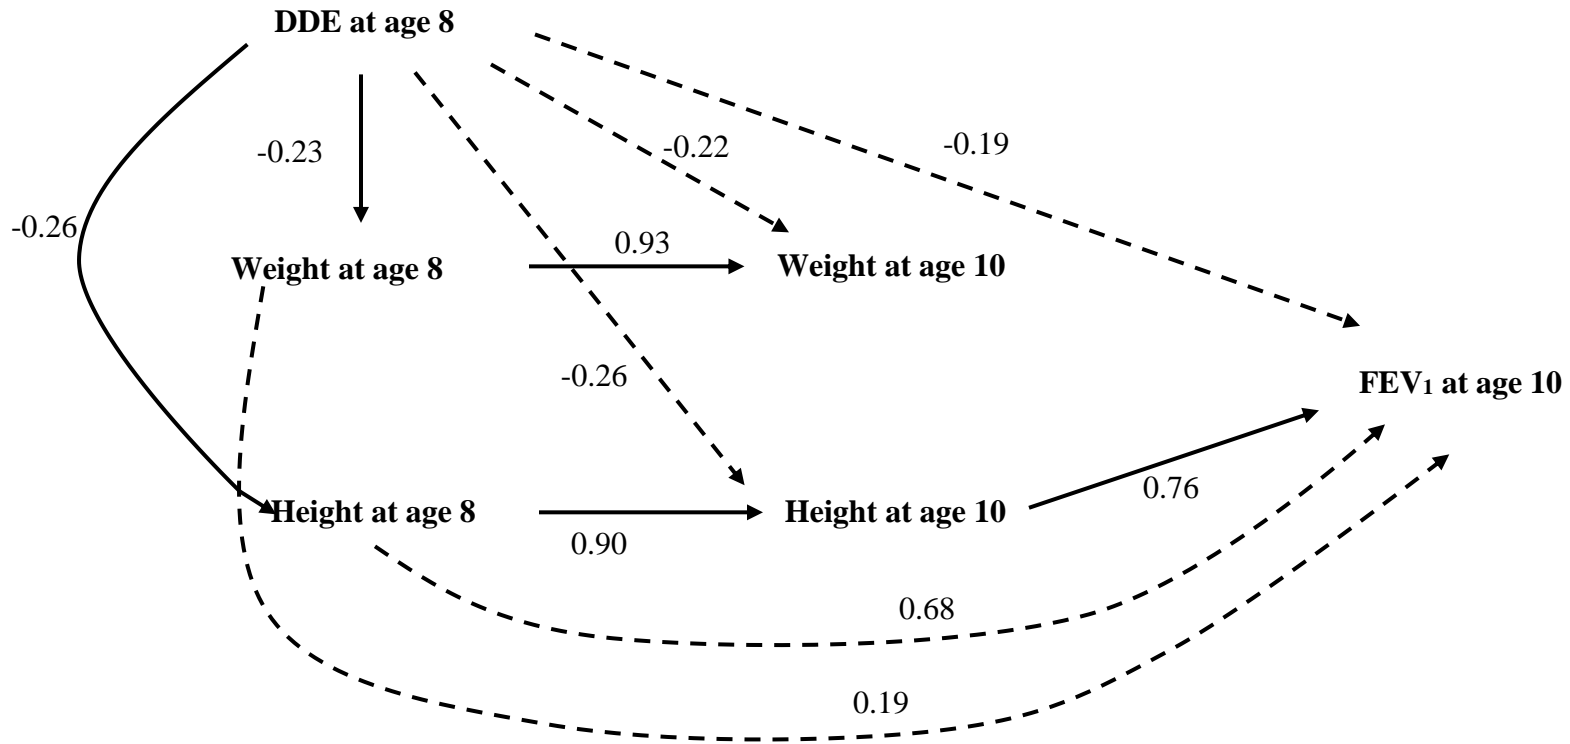

The path coefficients represented by solid arrows are direct effects while those represented by dashed arrows are indirect effects. Associations with non-significant total effects are not shown in this diagram. Goodness of Fit Criteria: Chi-squared test statistic = 32.4,  $p$ -value < 0.05; AGFI = 0.863; CFI = 0.983; RMSEA = 0.078.



**Figure S4.** Analytical path model showing statistically significant standardized direct and indirect effects of DDE exposure at eight years, height and weight at eight and ten years, and FEV<sub>1</sub> at age 10 years in girls.

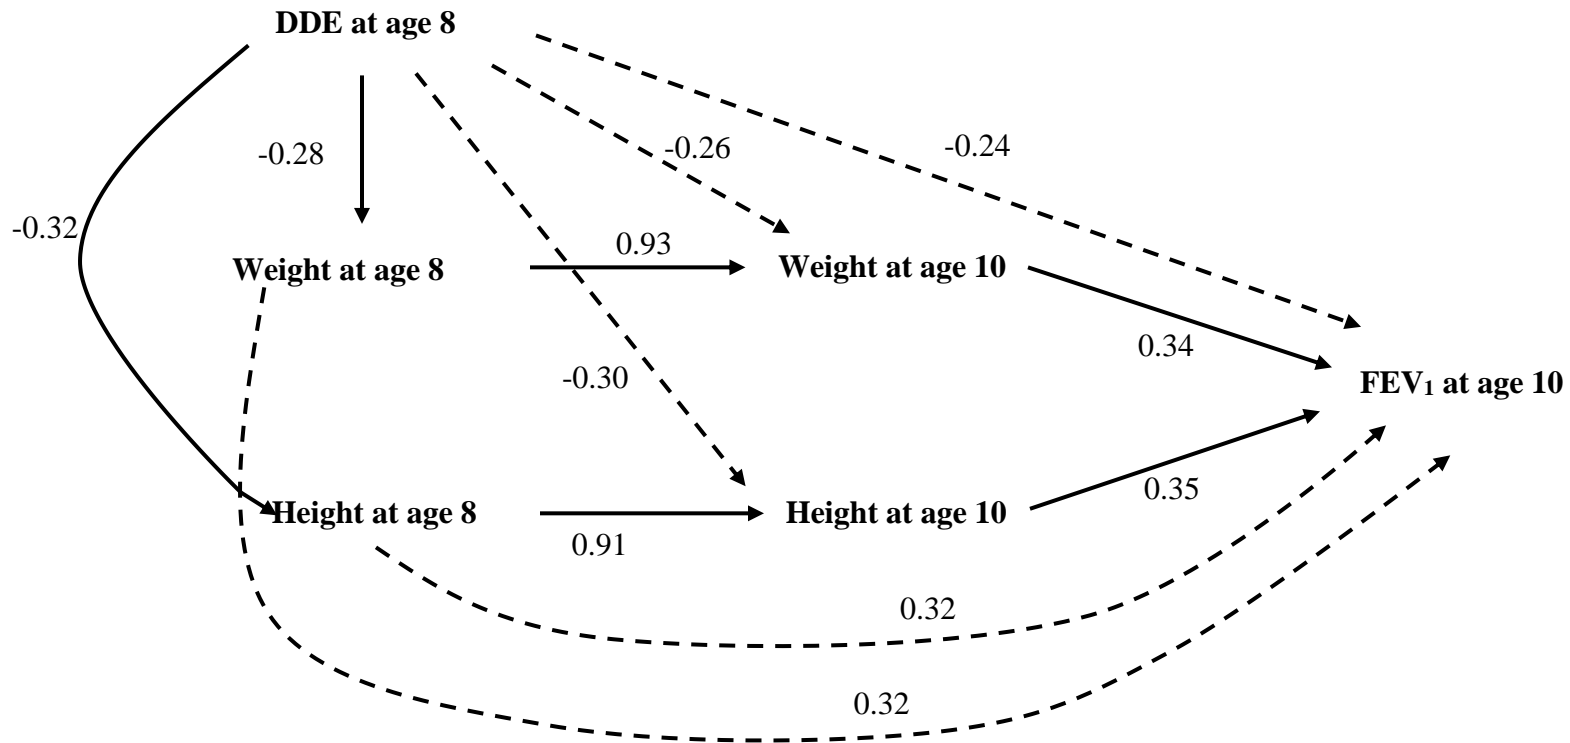

The path coefficients represented by solid arrows are direct effects while those represented by dashed arrows are indirect effects. Associations with non-significant total effects are not shown in this diagram. Goodness of Fit Criteria: Chi-squared test statistic = 17.2,  $p$ -value = 0.31; AGFI = 0.897; CFI = 0.997; RMSEA = 0.031.
